# Supplementary material for: Magnesium rescues the morphology of Bacillus subtilis mreB mutants through its inhibitory effect on peptidoglycan hydrolases
Source: PubMed Central journal article supplement (PMC8782873; doi:10.1038/s41598-021-04294-5), 2022-01-21
Supplement: 41598_2021_4294_MOESM4_ESM.pdf [file 41598_2021_4294_MOESM4_ESM.pdf]

## Supplementary Information

for

### **Magnesium rescues the morphology of *Bacillus subtilis mreB* mutants through its inhibitory effect on peptidoglycan hydrolases**

**Benoit Tesson<sup>a\*</sup>, Alex Dajkovic<sup>a,d</sup>, Ruth Keary<sup>a</sup>, Christian Marlière<sup>b</sup>, Christine C. Dupont-Gillain<sup>c</sup> and Rut Carballido-López<sup>a\*</sup>**

<sup>a</sup> Micalis Institute, INRAE, AgroParisTech, Université Paris-Saclay, 78350 Jouy-en-Josas, France.

<sup>b</sup> Laboratoire de Physique des Solides, LPS, University Paris-Saclay, CNRS, Orsay, France.

<sup>c</sup> Université catholique de Louvain, Institute of Condensed Matter and Nanosciences, Bio- and Soft Matter division, 1348, Louvain-la-Neuve, Belgium.

<sup>d</sup> Present address: Biomillenia (Design Pharmaceuticals), BIOCITECH, 93230 Romainville, France.

\* To whom correspondence should be addressed.

Email: [tessonben@gmail.com](mailto:tessonben@gmail.com) and [rut.carballido-lopez@inrae.fr](mailto:rut.carballido-lopez@inrae.fr)

**Supplementary Tables S1 to S3**

**Supplementary Figures S1 to S9**

**Legends for Movies 1 to 3**

**References**

## Supplementary Tables

**Table S1.** Quantification of different muropeptides eluted in the UPLC runs shown in Fig. S3 (peak numbers refer to Figure S3). DD-endopeptidase products are in green; DL-endopeptidase products are shown in blue; the dominant peak of the dimer containing singly amidated mDAP is highlighted in red. The percentage of each peak was calculated as the ratio of the peak area over the sum of areas of all peaks identified in the corresponding chromatogram. ds refers to disaccharide (GlcNAc-MurNAc) and is followed by numbers which indicate the peptide length, as follows: 2 = dipeptide (L-Ala-D-iGlu), 3 = tripeptide (L-Ala-D-iGlu-mDAP), 4 = tetrapeptide (L-Ala-D-iGlu-mDAP-D-Ala), 5 = pentapeptide (L-Ala-D-iGlu-mDAP-D-Ala-D-Ala). a = amidated. -Ac = deacetylated. Anhydro = anhydromuropeptide.

| Peak nr.           | Proposed structure                        | % of all peaks |                       |               |                                  |
|--------------------|-------------------------------------------|----------------|-----------------------|---------------|----------------------------------|
|                    |                                           | wt             | wt + Mg <sup>2+</sup> | $\Delta$ mreB | $\Delta$ mreB + Mg <sup>2+</sup> |
| 1                  | ds3                                       | 2,9            | 4,09                  | 3,07          | 3,52                             |
| 2                  | ds3a                                      | 17,78          | 18,79                 | 21,14         | 20,73                            |
| 3                  | ds3a-Ac                                   | 1,81           | 1,68                  | 3,31          | 3,25                             |
| 4                  | ds2                                       | 3,24           | 3,08                  | 4,53          | 3,53                             |
| 5                  | ds3a4                                     | 0,86           | 0,75                  | 1,25          | 1,05                             |
| 6                  | ds2-Ac                                    | 1,12           | 1,65                  | 1,16          | 1,43                             |
| 7                  | ds3a2a                                    | 0,86           | 0,75                  | 1,46          | 1,24                             |
| 8                  | ds3a2a-Ac                                 | 2,89           | 2,14                  | 4,84          | 3,14                             |
| 9                  | ds3a2a, ds3a3, ds3a4a                     | 1,6            | 1,02                  | 2,46          | 1,353                            |
| 10                 | ds5a                                      | 1,01           | 0,61                  | 3,37          | 1,61                             |
| 11                 | ds3 anhydro, ds3ads4-GlcNAc               | 1,19           | 1,33                  | 0,85          | 1,04                             |
| 12                 | ds3ds4, ds44                              | 0,94           | 1,43                  | 0,72          | 0,85                             |
| 13                 | ds3ads4                                   | 12,27          | 20,81                 | 6,66          | 10,65                            |
| 14                 | ds3ads4, ds4a4                            | 3,36           | 4,35                  | 3,1           | 4,32                             |
| 15                 | ds3ads4a-GlcNAc, ds3ads4-Ac, ds3a anhydro | 5,25           | 4,59                  | 3,57          | 4,28                             |
| 16                 | ds3ads4a                                  | 32,49          | 25,56                 | 29,02         | 28,79                            |
| 17                 | ds3ads4a, ds3ads4a-Ac                     | 3,52           | 3,04                  | 4,18          | 4,64                             |
| 18                 | ds3ads4-Ac                                | 4,67           | 2,73                  | 5,31          | 4,57                             |
| crosslinking index |                                           | 0,42           | 0,41                  | 0,39          | 0,40                             |

**Table S2.** Positive and negative charges detected by XPS in the wild-type and the  $\Delta mreB$  and the  $\Delta tagO$  mutants grown in LB medium supplemented or not with 25 mM  $Mg^{2+}$ . Results of two independent sets of experiments, expressed as molar fractions (in %), excluding hydrogen. Positive charges (charges +) = [bound metals ( $Na+2 \cdot Ca+K+2 \cdot Mg$ ) + protonated amines (Nprot)]. Negative charges (charges -) come from phosphate groups (P). The concentration of each element is indicated in Table 1.

|                                                  | Nprot | metals | Charges + | Charges - |
|--------------------------------------------------|-------|--------|-----------|-----------|
| <b>wt</b>                                        | 0,4   | 2,1    | 2,5       | 2,4       |
|                                                  | 0,4   | 2,5    | 2,9       | 2,2       |
| <b>wt +Mg<sup>2+</sup></b>                       | 0,2   | 3,2    | 3,4       | 1,7       |
|                                                  | 0,5   | 2,9    | 3,4       | 2,0       |
| <b><math>\Delta mreB</math></b>                  | 0,5   | 3,3    | 3,8       | 2,4       |
|                                                  | 0,6   | 2,0    | 2,6       | 2,0       |
| <b><math>\Delta mreB</math> +Mg<sup>2+</sup></b> | 0,5   | 3,4    | 3,9       | 2,9       |
|                                                  | 0,5   | 2,4    | 2,9       | 2,0       |
| <b><math>\Delta tagO</math> +Mg<sup>2+</sup></b> | 1,0   | 2,1    | 3,1       | 0,2       |
|                                                  | 1,1   | 2,9    | 4,0       | 0,2       |

**Table S3.** List of strains used in this study

| <b>Strain name</b> | <b>Genotype</b>                                                                        | <b>Reference</b>              |
|--------------------|----------------------------------------------------------------------------------------|-------------------------------|
| 168                | <i>trpC2</i>                                                                           | [1]                           |
| 3725               | <i>trpC2</i> $\Delta$ <i>mreB</i> (Kan)                                                | [2]                           |
| EB1451             | <i>hisA1 argC4 metC3</i> $\Delta$ <i>tagO</i> (Erm)                                    | [3]                           |
| NC229              | <i>trpC2</i> $\Delta$ <i>tagO</i> (Ery) <i>amyE::P<sub>hyperspank</sub>-tagO</i> (Kan) | [4]                           |
| BKK07710           | <i>trpC2</i> $\Delta$ <i>ltaS</i> (Kan)                                                | Bacillus Genetic Stock Centre |
| eRCL007            | 6xHis-LytE overproduction strain                                                       | This study                    |

---

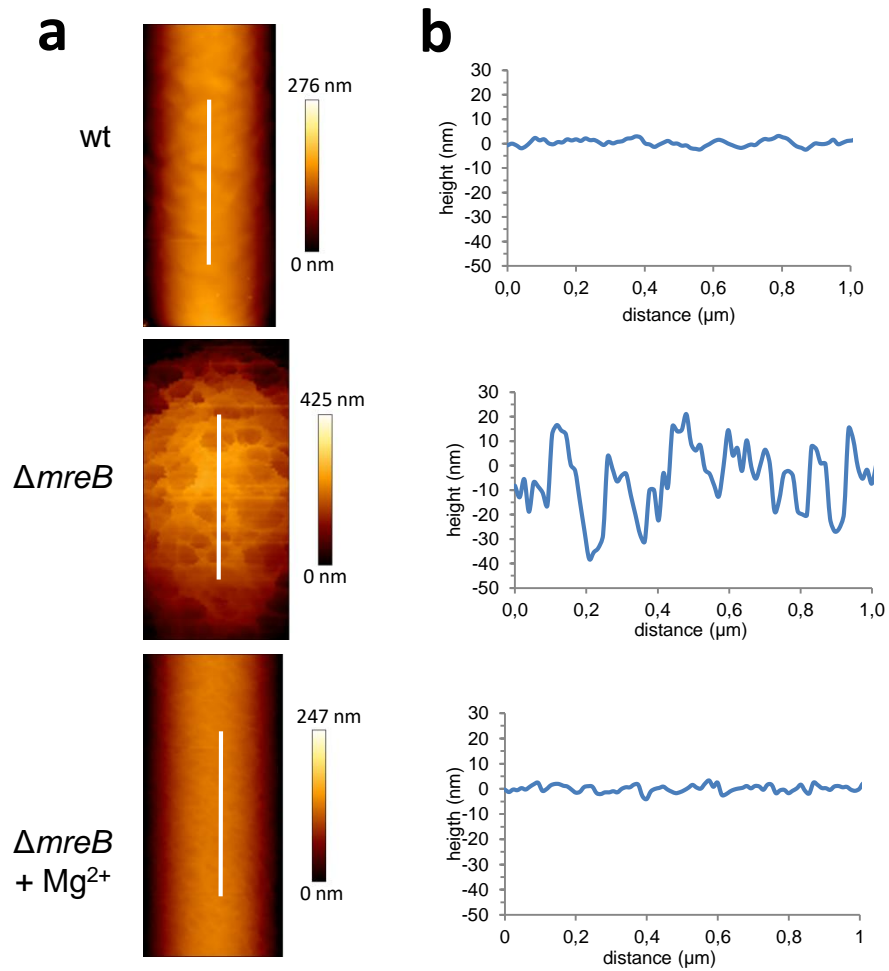

**Figure S1.** Height profiles (b) from longitudinal transects (white lines) in the AFM topography maps (a)

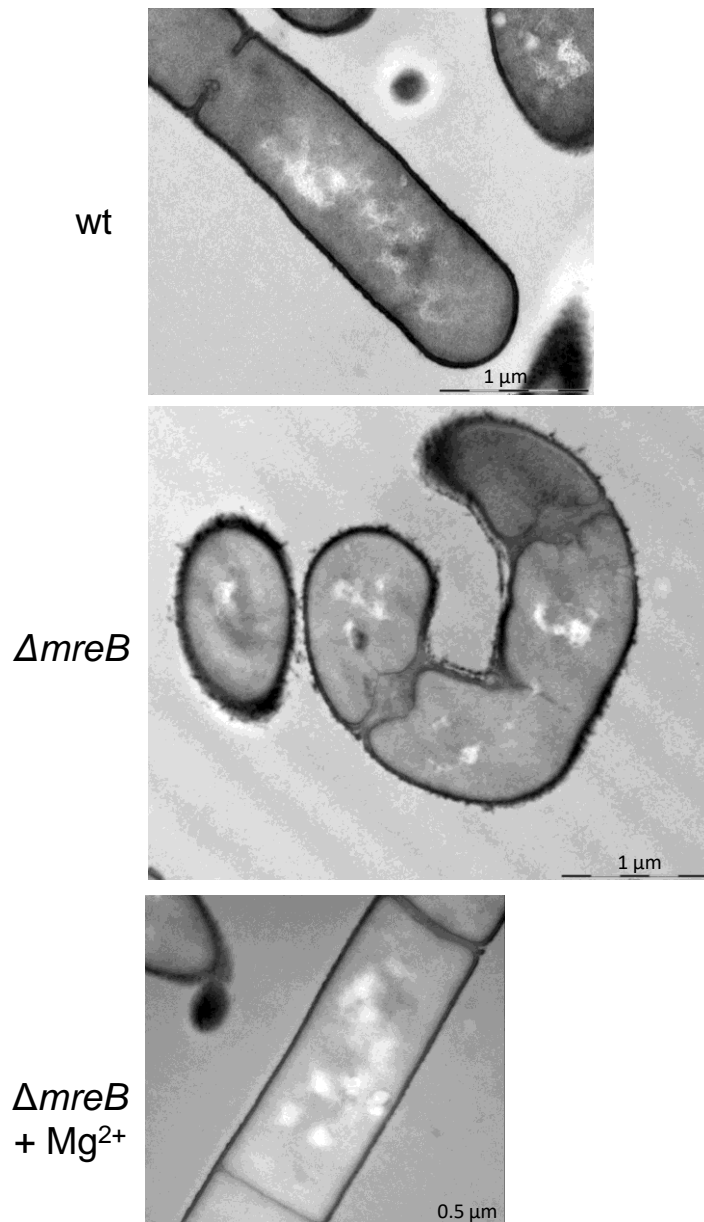

**Figure S2.** Transmission electron microscopy micrographs of representative transversal sections of vegetative wild-type and  $\Delta mreB$  mutant cells grown in LB medium in the presence and in the absence of 25 mM Mg<sup>2+</sup>.

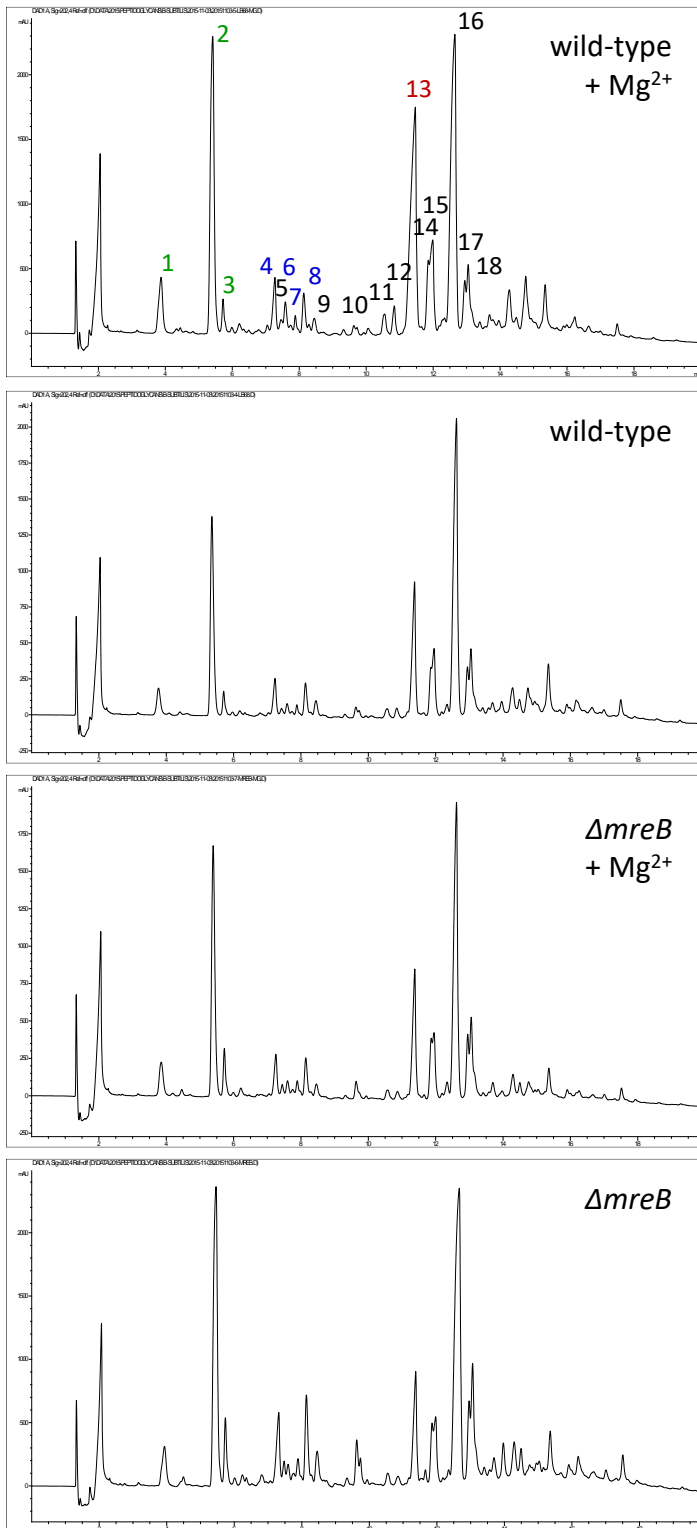

**Figure S3.** UPLC profiles of muropeptides of PG purified from the wild-type and the  $\Delta mreB$  mutant cells growing exponentially in LB medium in the presence and in the absence of 25 mM  $Mg^{2+}$ . Peaks were labelled from 1 to 18 following their retention time. Their structure is shown in Table S1. Peaks labelled in red correspond to amidated dimeric species. Peaks labelled in green correspond to DD-endopeptidase products; peaks labelled in blue correspond to DL-endopeptidase products, The dominant peak of the dimer containing singly amidated mDAP is highlighted in red.

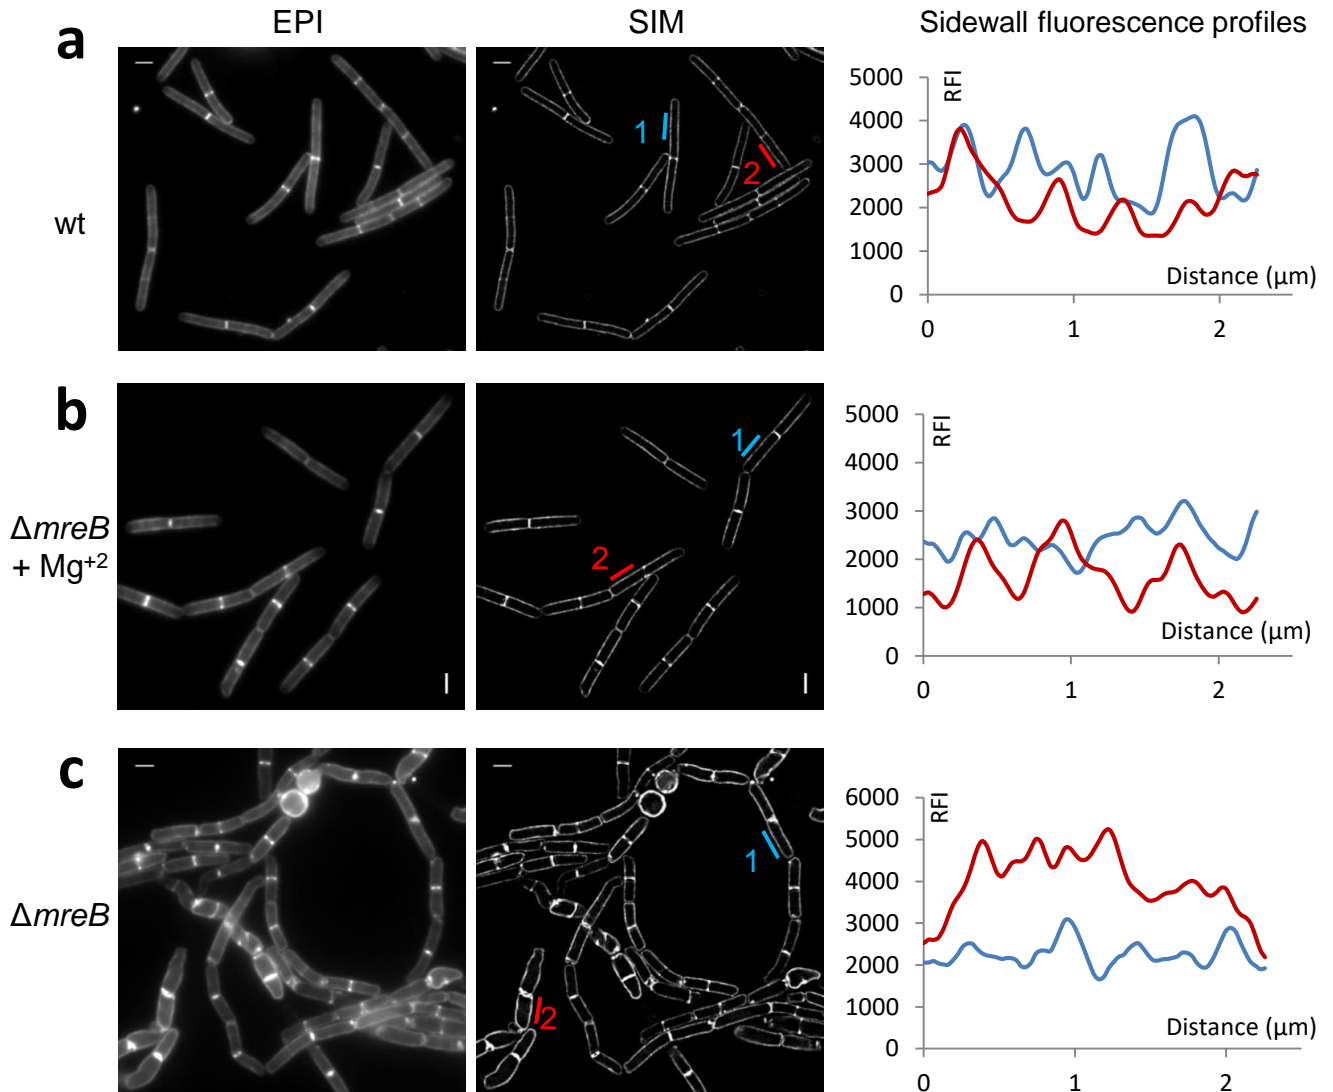

**Figure S4.** Dynamics of PG synthesis. Wild-type (a) and  $\Delta mreB$  cells grown in the presence (b) and in the absence of added  $\text{Mg}^{+2}$  (c) stained for 2 min with 1 mM TDL. Epifluorescence (EPI) and SIM images, and fluorescence profiles along the sidewalls of the cells labelled 1 (blue) and 2 (red) in the SIM images. Scale bars, 2  $\mu\text{m}$ .



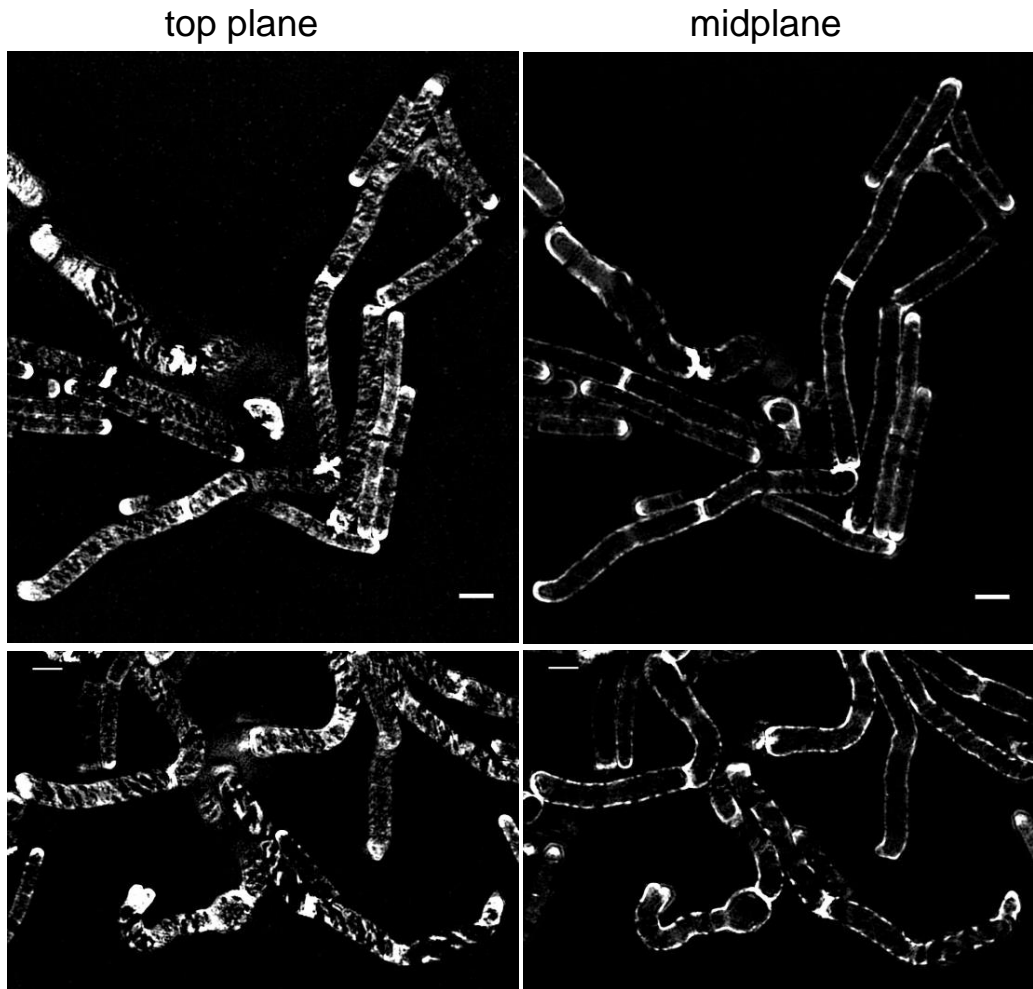

**Figure S5.** SIM images of the TDL pulse chase experiment performed in batch cultures of  $\Delta mreB$  strain grown in LB medium without added  $Mg^{+2}$ , stained 20 min with TDL, rinsed and allowed to grow for 35 min in fresh LB. Scale bars, 2  $\mu m$ .

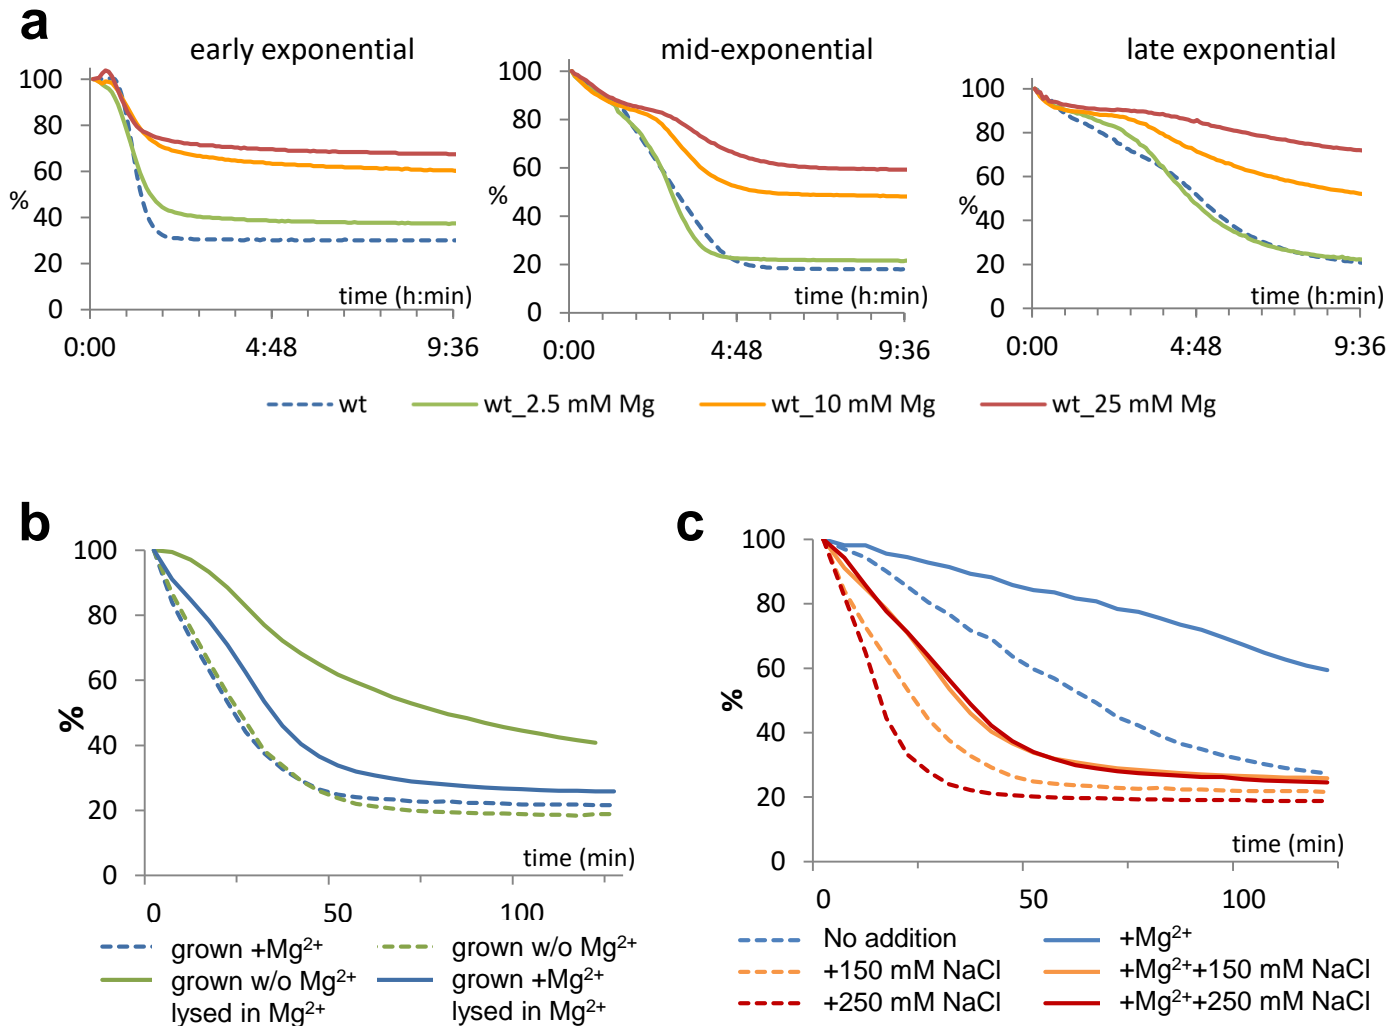

**Figure S6.** Autolysis curves of wild-type live cells in the presence of divalent cations. **(a)** Cells were grown to early exponential ( $OD_{600}$  0.2-0.3), mid-exponential ( $OD_{600}$  0.5-0.6) and late exponential ( $OD_{600}$  0.7-0.8) in LB medium supplemented with different concentrations of  $Mg^{2+}$  and autolysed by 75 mM sodium azide. **(b)** Cells were grown to mid-exponential phase in the presence (blue lanes) or in the absence (green lanes) of 25 mM  $Mg^{2+}$  and autolysed in PBS in the presence (plein lanes) and in the absence (dashed lines) of 25 mM  $Mg^{2+}$ . **(c)** Cells were grown in the presence of 25 mM  $Mg^{2+}$  and autolysed in PBS supplemented with 150 mM or 250 mM NaCl with or without 25 mM  $Mg^{2+}$ . Autolysis curves are expressed as a percentage of the maximum initial  $OD_{600}$ .

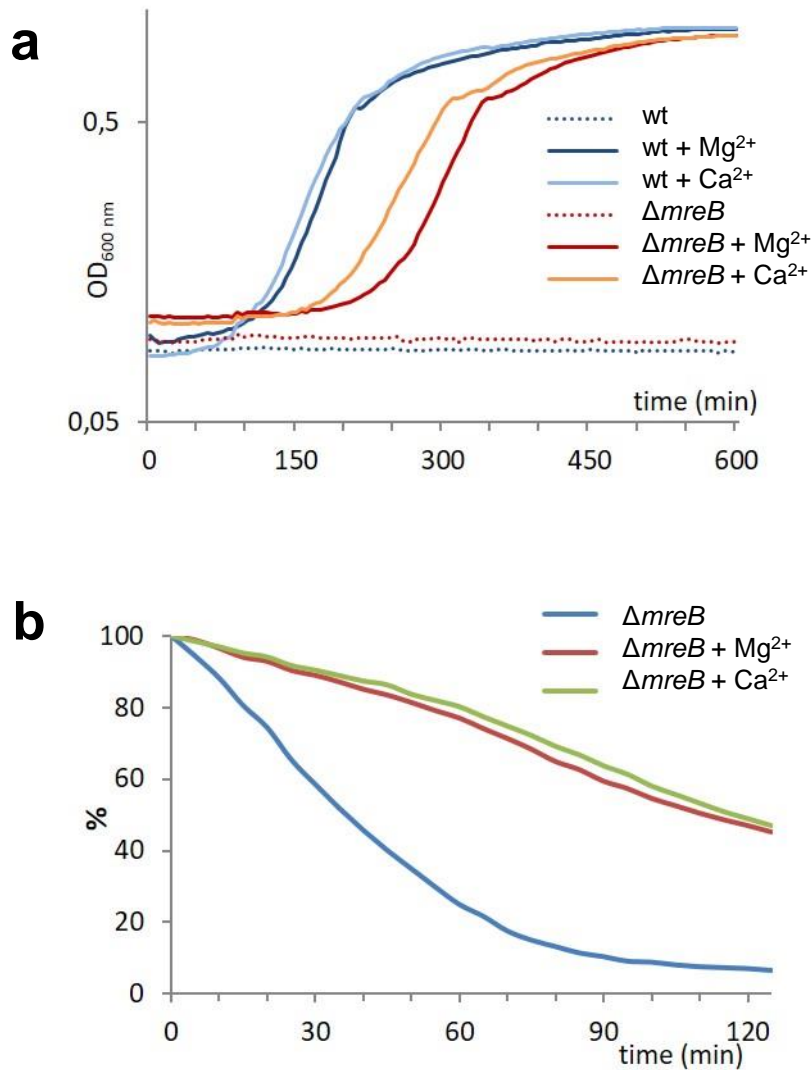

**Figure S7.** (a) Growth curve of the wild-type and the *ΔmreB* strain in the presence of 0.1 mg/ml of lysozyme in LB medium with or without addition of 25 mM MgSO<sub>4</sub> or 25 mM CaCl<sub>2</sub>, as indicated. (b) Autolysis curve of the *ΔmreB* mutant grown in LB medium in the presence of 25 mM Mg<sup>2+</sup> and autolysed in LB supplemented with 75 mM azide with or without addition of 25 mM MgSO<sub>4</sub> or 25 mM CaCl<sub>2</sub>. Autolysis experiments in the presence of Ca<sup>2+</sup> could not be done by resuspension in PBS because CaCl<sub>2</sub> is not soluble in PBS. Autolysis curves are expressed as percentage of maximum OD<sub>600</sub>.

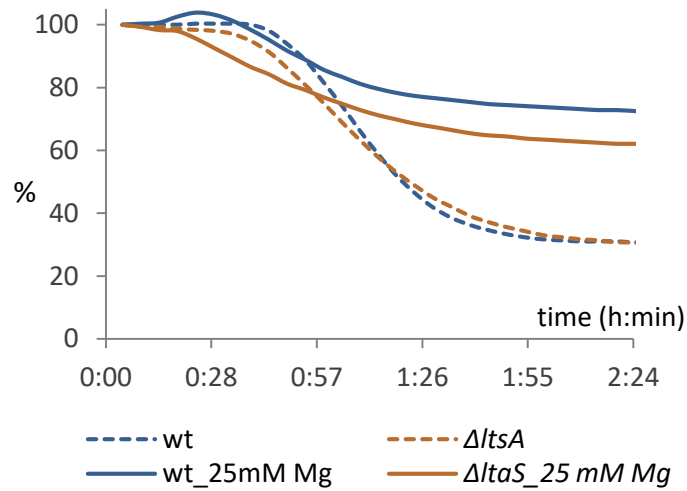

**Figure S8.** Wild-type and  $\Delta ltaS$  cells were grown to early exponential phase ( $OD_{600}$  0.3) in LB medium supplemented or not with 25 mM  $Mg^{+2}$  and autolysed by addition of 75 mM sodium azide. Autolysis curves are expressed as percentage of maximum  $OD_{600}$ , at which autolysis was induced.

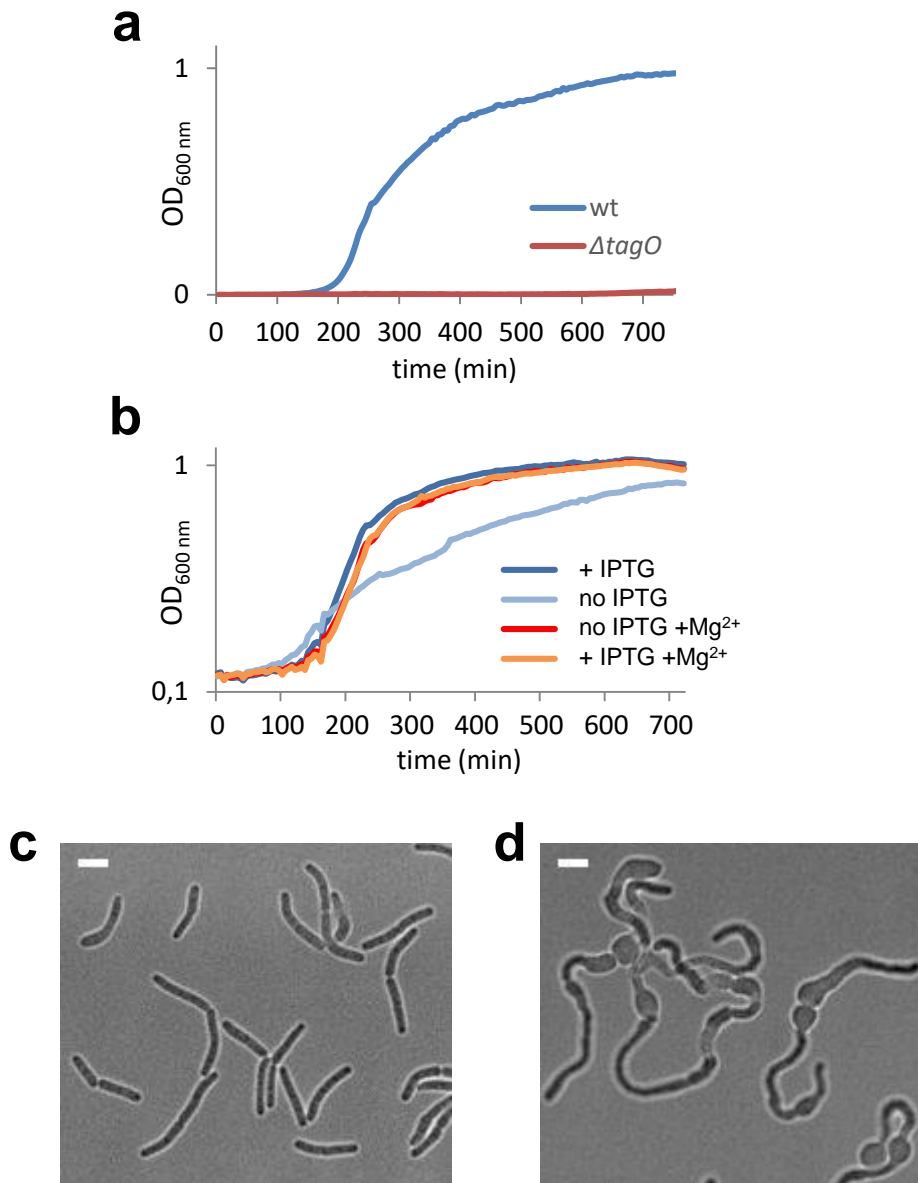

**Figure S9.** (a) Growth curves of the wild-type and the  $\Delta tagO$  null mutant grown in unsupplemented LB medium. (b) Growth curves of the  $P_{spac} tagO$  strain grown in LB containing or not 0.5 mM IPTG and 25 mM  $MgSO_4$ . (c, d) Phase contrast images of  $P_{spac} tagO$  cells growing exponentially in LB in the absence of inducer, with (c) or without 25 mM  $Mg^{+2}$  (d). Scale bars, 3  $\mu m$ .

## **Movies Legends**

**Movie 1.** TDL depletion experiment of  $\Delta mreB$  cells. Cells growing exponentially in LB medium were stained with 1mM TDL for 20 min, rinsed and further grown in LB in the microfluidics device. Phase contrast (*Left*) and TDL fluorescence (*Right*) images were taken every 5 min. The first frame of the movie corresponds to 0 min after rinsing. Scale bars, 2  $\mu$ m.

**Movie 2.** TDL depletion experiment of wild-type cells. Cells growing exponentially in LB medium were stained with 1mM TDL for 20 min, rinsed and further grown for 60 min in LB in the microfluidics device. Phase contrast (*Left*) and TDL fluorescence (*Right*) images were taken every 5 min. The first frame of the movie corresponds to 0 min after rinsing. Scale bars, 2  $\mu$ m.

**Movie 3.** Growth of the  $\Delta mreB$  strain in the microfluidics device at 37°C in LB medium supplemented with 25 mM CaCl<sub>2</sub>. Phase contrast images were taken every 20 s.

## References

1. De San Eustaquio-Campillo, A., Cornilleau, C., Guerin, C., Carballido-López, R., and Chastanet, A. PamR, a new MarR-like regulator affecting prophages and metabolic genes expression in *Bacillus subtilis*. *PLoS One* **12**, e0189694 (2017).
2. Formstone, A., and Errington, J. A magnesium-dependent *mreB* null mutant: implications for the role of *mreB* in *Bacillus subtilis*. *Mol. Microbiol.* **55**, 1646-1657 (2005).
3. D'Elia, M.A., Millar, K.E., Beveridge, T.J., and Brown, E.D. Wall teichoic acid polymers are dispensable for cell viability in *Bacillus subtilis*. *J. Bacteriol.* **188**, 8313-8316 (2006).
4. Mirouze, N., Ferret, C., Cornilleau, C., and Carballido-Lopez, R. Antibiotic sensitivity reveals that wall teichoic acids mediate DNA binding during competence in *Bacillus subtilis*. *Nat. Commun.* **9**, 5072 (2018).
